# Supplementary figures and images for: The Glucocorticoid Receptor is Required for Efficient Aldosterone-Induced Transcription by the Mineralocorticoid Receptor
Source: PubMed Central journal article supplement — bioRxiv. 2023 Jun 17:2023.01.26.525745. Originally published 2023 Jan 26. Preprint. [Version 2] doi: 10.1101/2023.01.26.525745 (PMC9928040; doi:10.1101/2023.01.26.525745), 2023-06-17

# Supplementary Figure 1

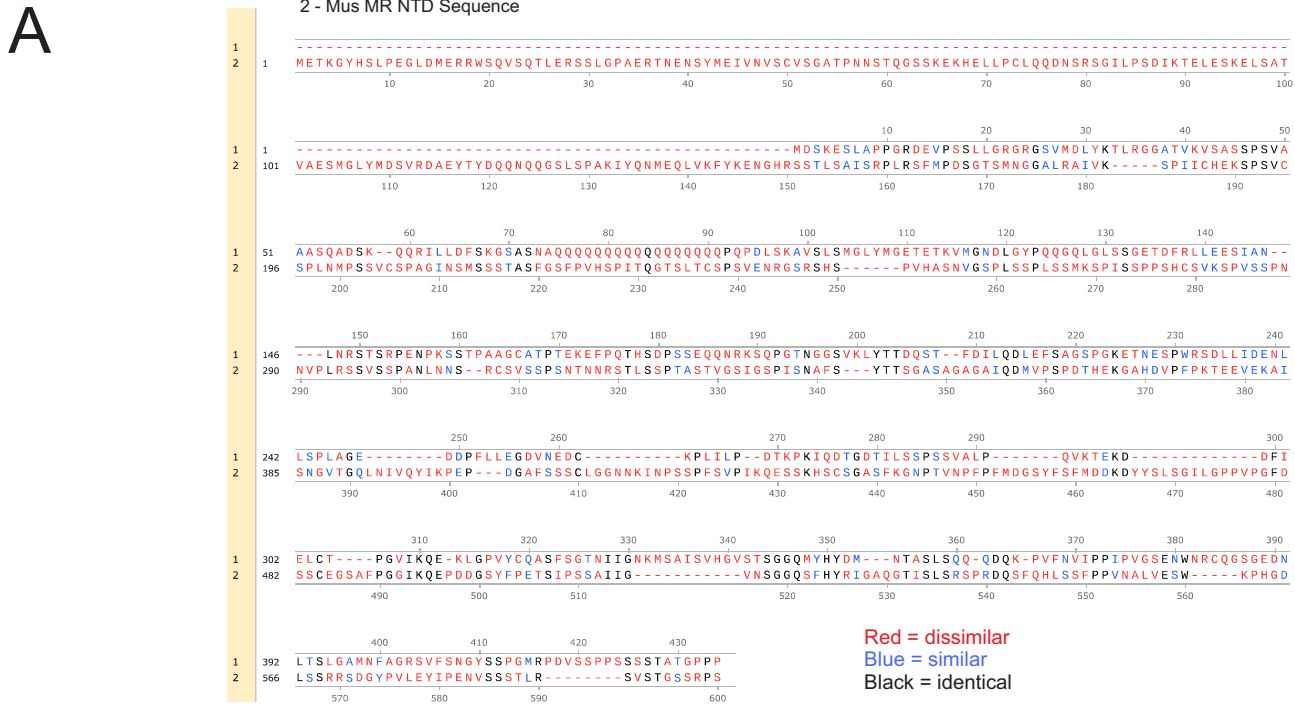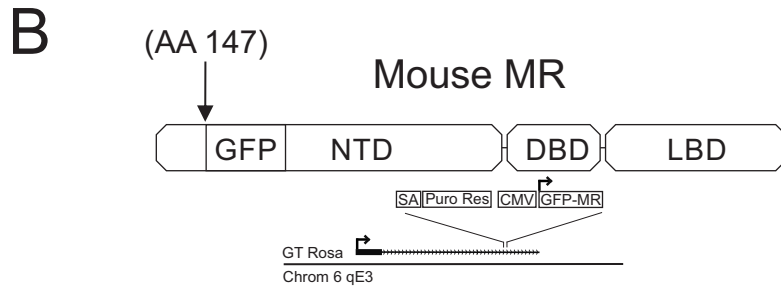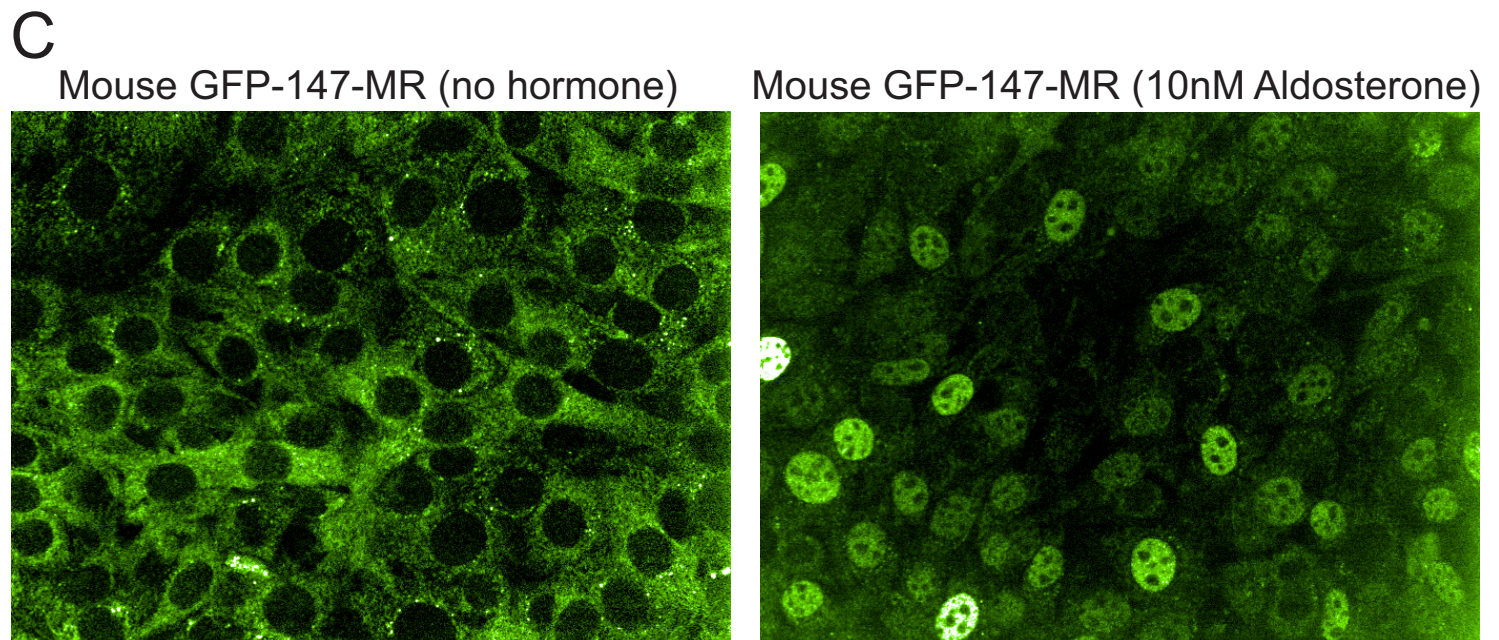

Supplement: media-1.pdf [file media-1.pdf]

# Supplementary Figure 2

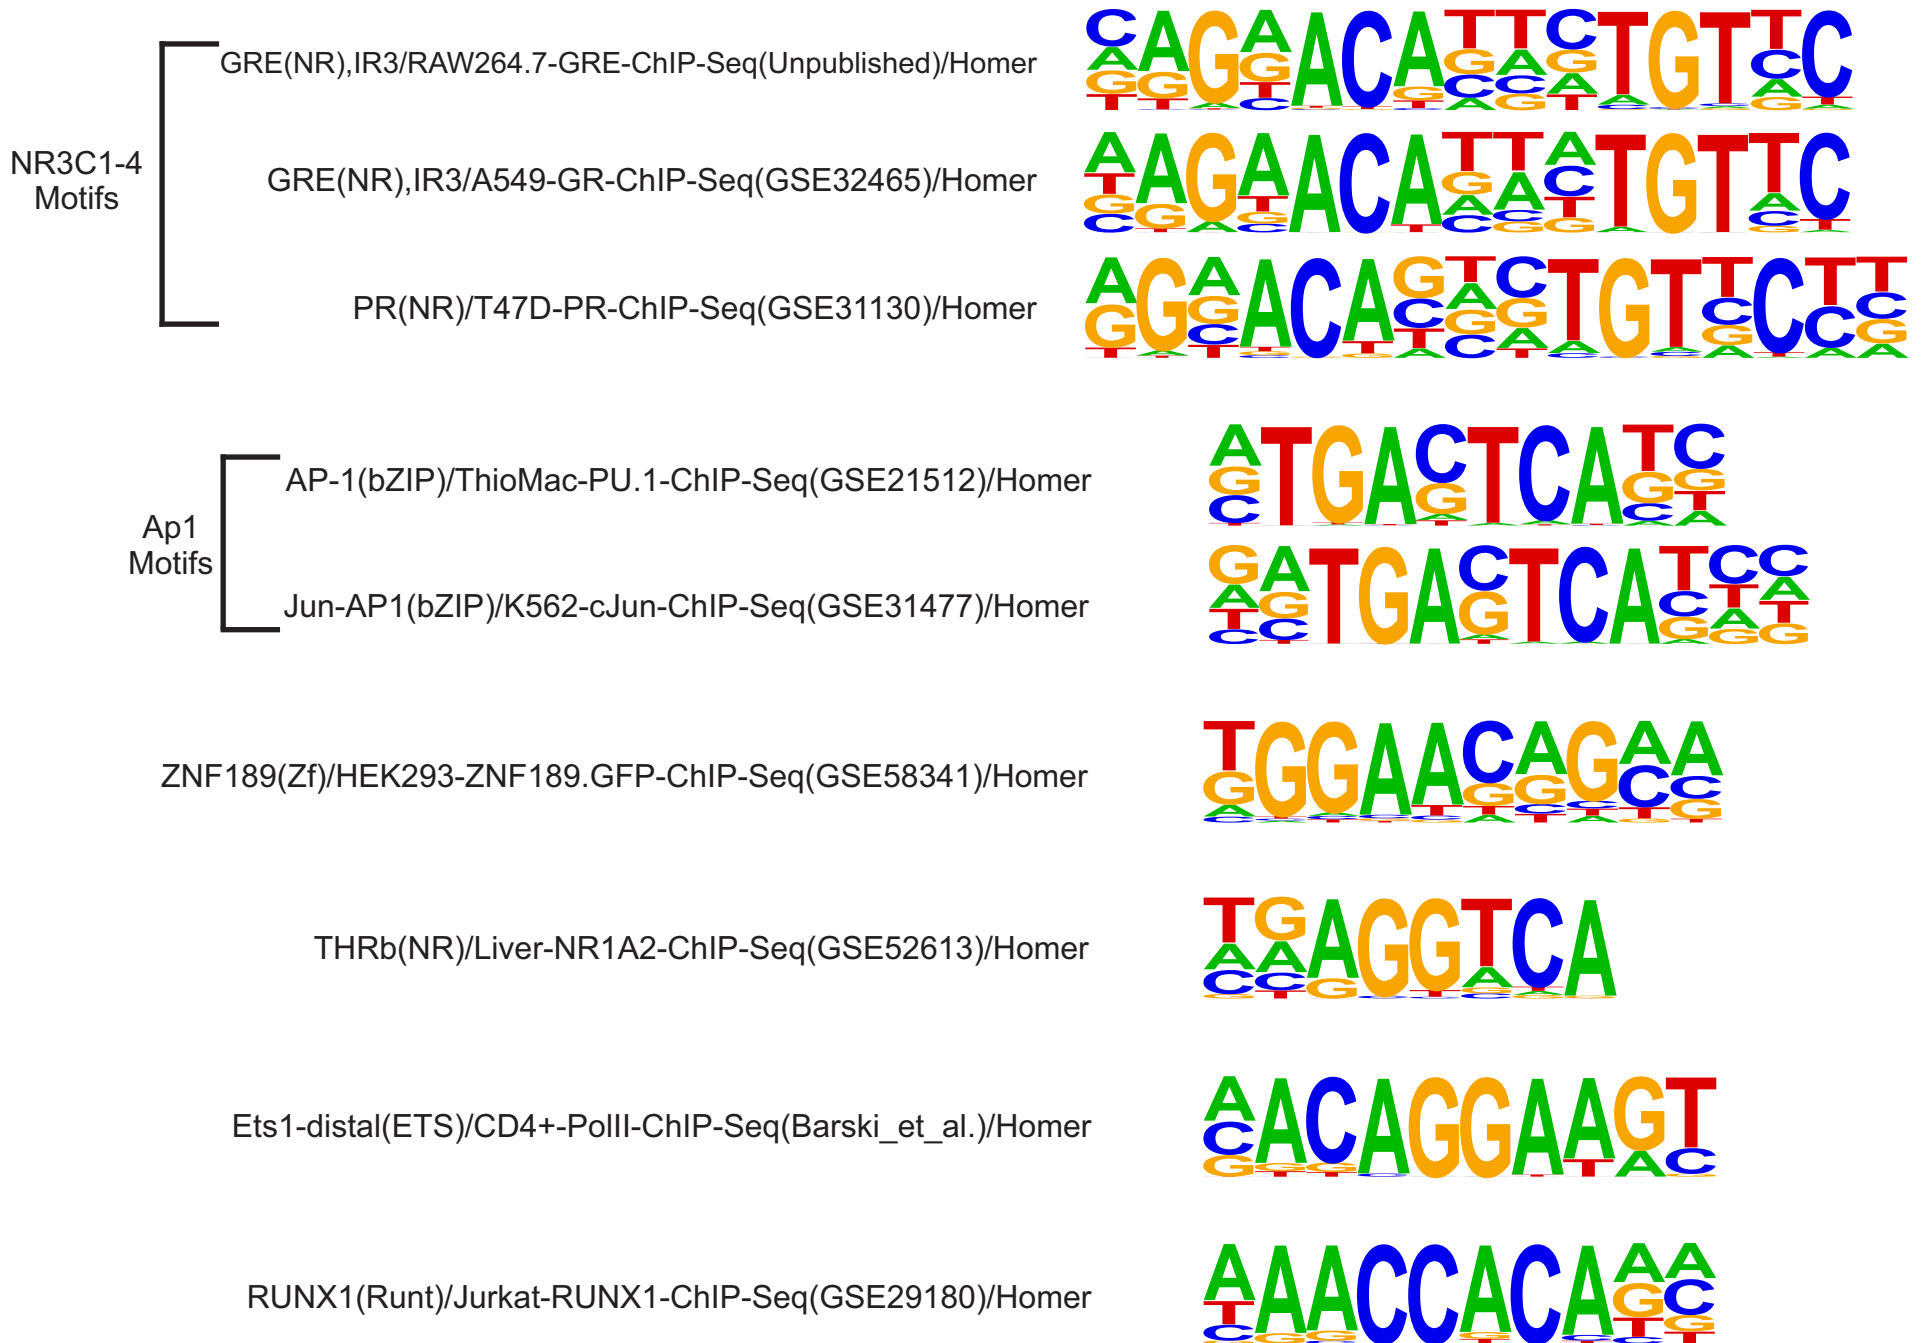

Supplement: media-2.pdf [file media-2.pdf]

### Supplementary Figure 3

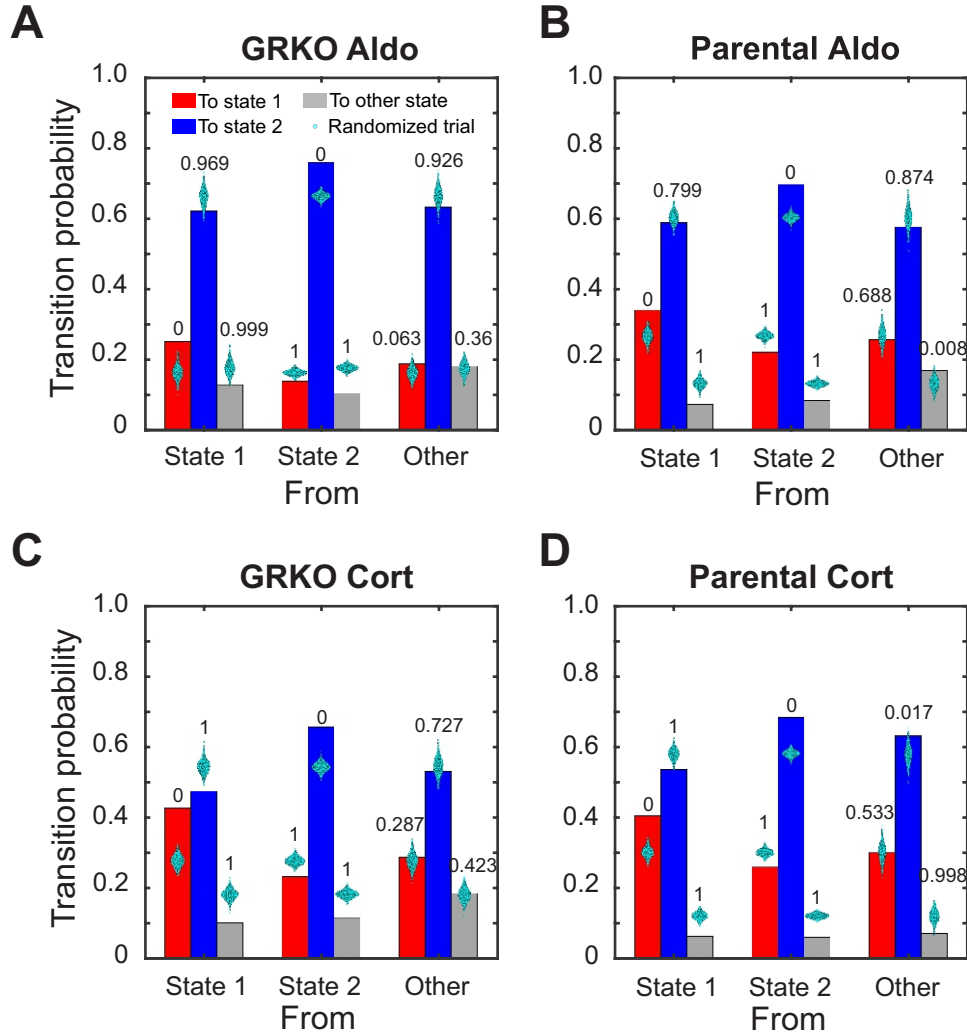

Supplement: media-3.pdf [file media-3.pdf]
